# Supplementary material for: Breast cancer patients in Nigeria: Data exploration approach
Source: PubMed Central journal article supplement (PMC5612794; doi:10.1016/j.dib.2017.08.038), 2017-09-01
Supplement: mmc1.pdf [file mmc1.pdf]

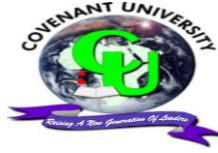

**COVENANT UNIVERSITY**  
**COLLEGE OF SCIENCE AND TECHNOLOGY**  
**DEPARTMENT OF MATHEMATICS**

CANAANLAND, KM 10, IDIROKO ROAD  
P.M.B 1023, OTA, OGUN STATE, NIGERIA

[www.covenantuniversity.edu.ng](http://www.covenantuniversity.edu.ng), [mat.covenantuniversity.edu.ng](http://mat.covenantuniversity.edu.ng)

**EXTERNAL MEMO**

---

**To:** Editor, Data in Brief  
**From:** Corresponding Author  
**Date:** 8<sup>th</sup> August, 2017  
**Subject:** **Conflict of Interest**

---

I thereby declare the absence of any conflict of interest among the authors.

The authors have read the final draft and unanimously agreed that the paper be sent for review.

Pelumi E. Oguntunde (Ph.D)  
Department of Mathematics, Covenant University, Nigeria  
Google Scholar: Pelumi E. Oguntunde (Ph.D)  
Research Gate: Pelumi Oguntunde  
ORCID ID: 0000-0003-3234-4142  
SCOPUS ID: 56191957200
